# Supplementary material for: Boride-mediated synthesis of a highly active cobalt-based electrocatalyst for alkaline hydrogen evolution reaction
Source: Royal Society of Chemistry journal article supplement (doi:10.1039/d3ta02150e), 2023-01-01
Supplement: d3ta02150e1.pdf [file d3ta02150e1.pdf]

## Supporting Information

### **Boride-Mediated Synthesis of Highly Active Cobalt-Based Electrocatalyst for Alkaline Hydrogen Evolution Reaction**

Yanmei Ren<sup>a</sup>, Jiajun Wang<sup>a</sup>, Weizhen Wang<sup>b</sup>, He Wen<sup>a</sup>, Muhua Chen<sup>a</sup>, Yuping Qiu<sup>a</sup>,  
Guangyao Li<sup>a</sup>, Zhiqing Yang<sup>c</sup>, and Ping Wang<sup>\*a</sup>

<sup>a</sup> School of Materials Science and Engineering, South China University of Technology,  
Guangzhou 510641, P. R. China

<sup>b</sup> Hong Kong Polytechnic University, Hong Kong 999077, P. R. China

<sup>c</sup> Ji Hua Laboratory, Foshan 528000, P. R. China

\*Corresponding Author

E-mail: mspwang@scut.edu.cn (P. Wang)

**Chemicals and Materials:** The cobalt foam (CF,  $\geq 99.0\%$  purity) with a thickness of 1.80 mm, an area density of about  $650 \text{ g}\cdot\text{m}^{-2}$  and an average pore size of 0.25–0.80 mm was purchased from Incoatom. Cobalt sulfate heptahydrate ( $\text{CoSO}_4\cdot 7\text{H}_2\text{O}$ , 99.5%, Macklin), dimethylamine borane (DMAB, 96.0%, Macklin), disodium succinate ( $\text{C}_4\text{H}_4\text{Na}_2\text{O}_4$ , 99.0%, Macklin), potassium hydroxide (KOH, 95.0%, Macklin), Pt/C (20 wt% Pt on Vulcan XC-72R, Macklin), nafion solution (5 wt% in mixture of lower aliphatic alcohols and water, Sigma-Aldrich), cobalt powder (Co, 99.9%, Aladdin), boron powder (B, 98.0%, Macklin) and other reagents of analytical grade were all obtained from commercial sources and used without further purification. Deionized (DI) water was used throughout the experiments.

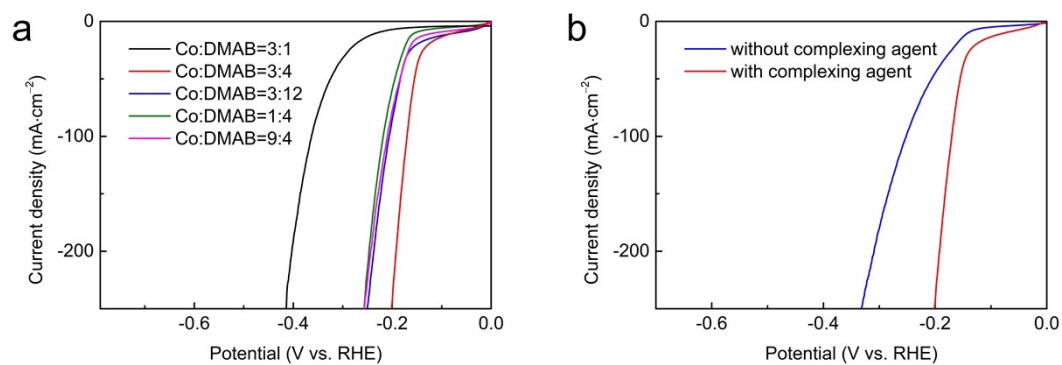

**Figure S1.** HER polarization curves (with 95% iR compensation) of the  $\text{Co}_2\text{B}/\text{CoO}/\text{H}_3\text{BO}_3/\text{CF}$  catalysts that were prepared using reduction solution (a) with different Co/DMAB molar ratios, (b) with and without complexing agent and Co/DMAB molar ratio was fixed at 3:4.

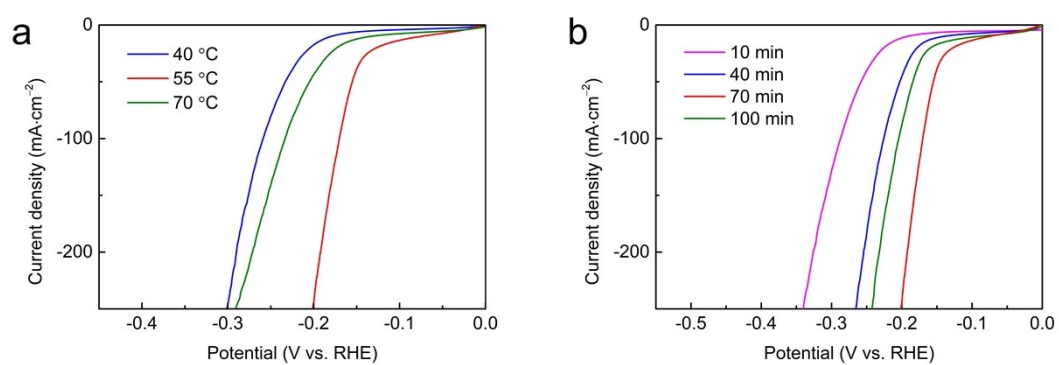

**Figure S2.** HER polarization curves (with 95% iR compensation) of the Co<sub>2</sub>B/CoO/H<sub>3</sub>BO<sub>3</sub>/CF catalysts that were prepared (a) at different reduction temperatures in the presence of C<sub>4</sub>H<sub>4</sub>Na<sub>2</sub>O<sub>4</sub> and a fixed Co/DMAB molar ratio of 3:4; (b) at 55 °C in the presence of C<sub>4</sub>H<sub>4</sub>Na<sub>2</sub>O<sub>4</sub> and a fixed Co/DMAB molar ratio of 3:4 with different reduction times.

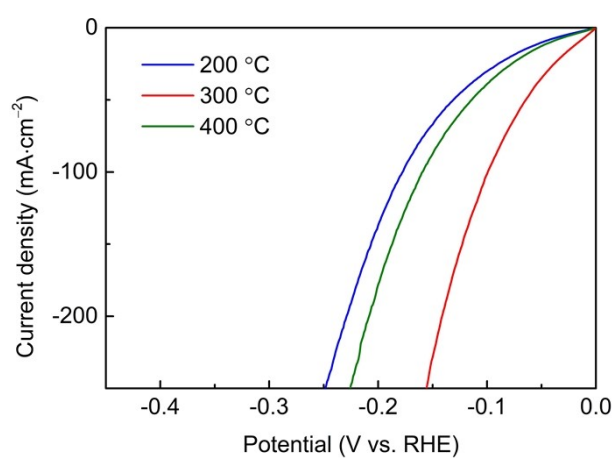

**Figure S3.** HER polarization curves (with 95% iR compensation) of the Co<sub>2</sub>B/CoO/H<sub>3</sub>BO<sub>3</sub>/CF catalysts that were prepared at 55 °C for 70 min in the presence of C<sub>4</sub>H<sub>4</sub>Na<sub>2</sub>O<sub>4</sub> and a fixed Co/DMAB molar ratio of 3:4 with different annealing temperatures.

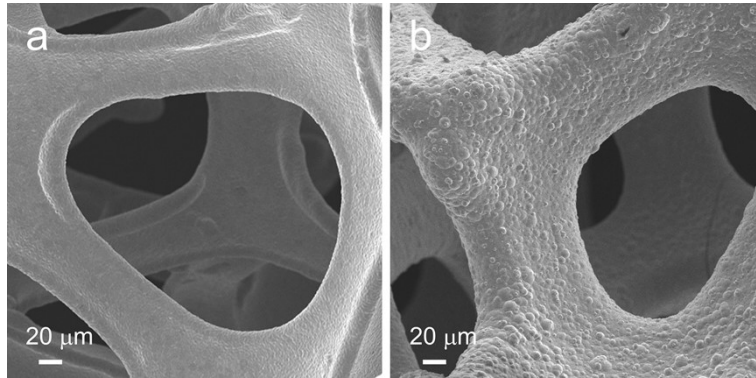

**Figure S4.** FE-SEM images of (a) CF and (b) Co<sub>2</sub>B/CoO/H<sub>3</sub>BO<sub>3</sub>/CF at low magnification.

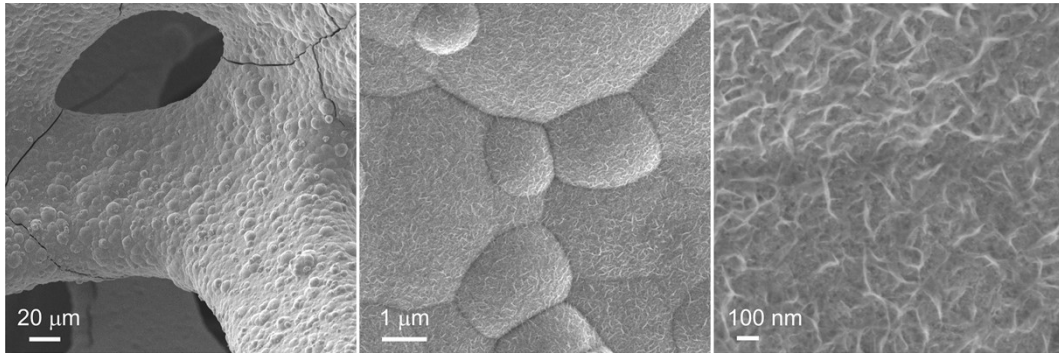

**Figure S5.** FE-SEM images of Co/CoO/B<sub>2</sub>O<sub>3</sub>/CF at different magnifications.

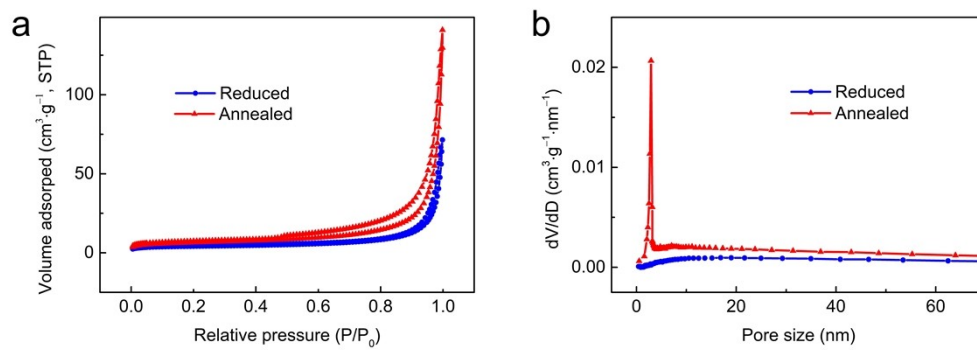

**Figure S6.** (a) N<sub>2</sub> adsorption-desorption isotherms and (b) the corresponding pore size distributions of the reduced and annealed samples.

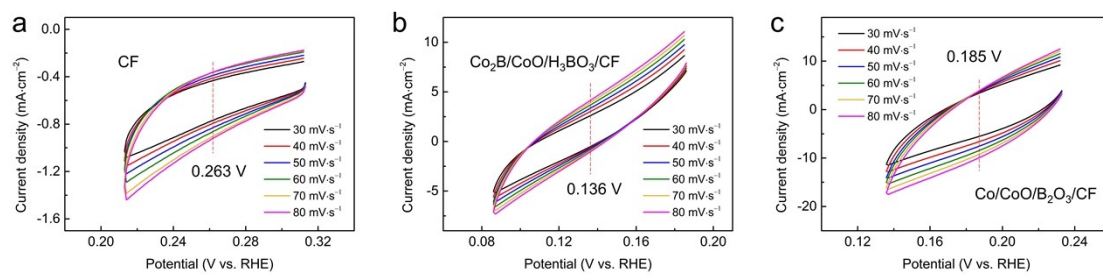

**Figure S7.** CV curves of (a) CF, (b) Co<sub>2</sub>B/CoO/H<sub>3</sub>BO<sub>3</sub>/CF and (c) Co/CoO/B<sub>2</sub>O<sub>3</sub>/CF catalysts at varied scan rates.



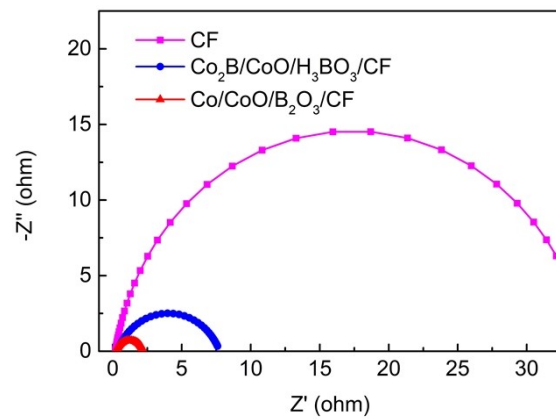

**Figure S8.** EIS Nyquist plots of various electrocatalysts at open-circuit potential.

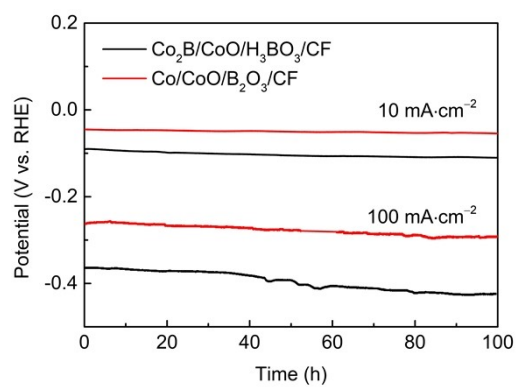

**Figure S9.** Chronopotentiometric curves of the Co<sub>2</sub>B/CoO/H<sub>3</sub>BO<sub>3</sub>/CF and Co/CoO/B<sub>2</sub>O<sub>3</sub>/CF catalysts at 10 and 100 mA·cm<sup>-2</sup>, respectively.

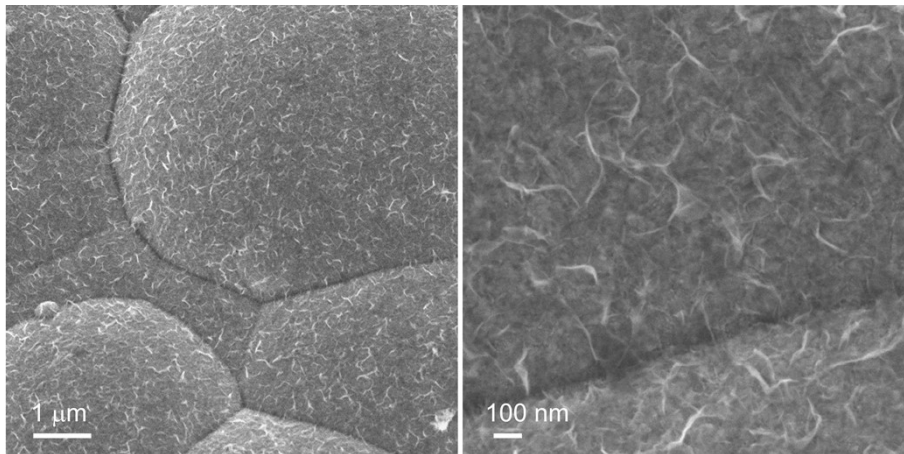

**Figure S10.** FE-SEM images of the post-used Co/CoO/B<sub>2</sub>O<sub>3</sub>/CF catalyst after 100 h of durability test.

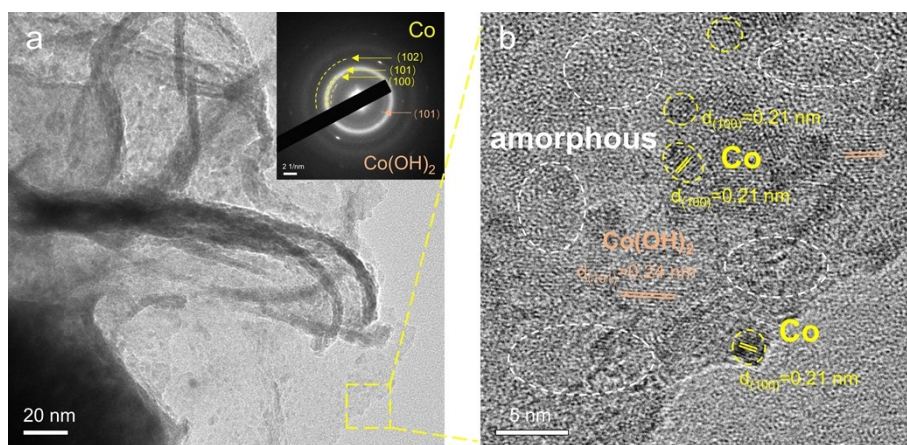

**Figure S11.** (a) TEM image and the corresponding SAED pattern (inset) and (b) HRTEM image of the post-used Co/CoO/B<sub>2</sub>O<sub>3</sub>/CF catalyst after 100 h of durability test.

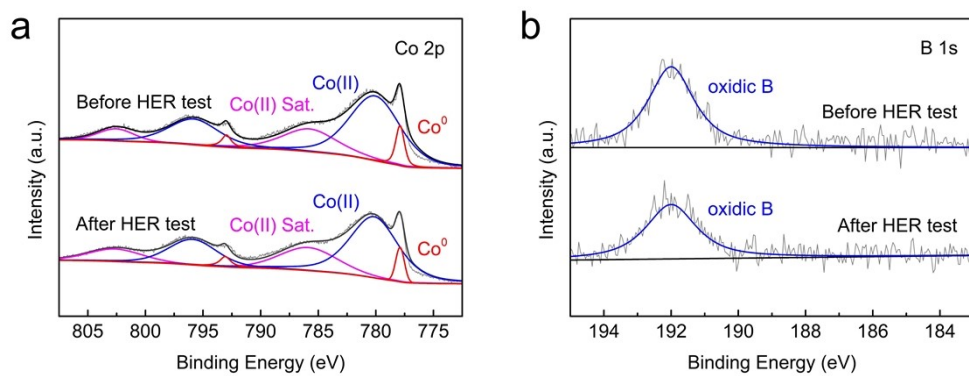

**Figure S12.** XPS spectra of the Co/CoO/B<sub>2</sub>O<sub>3</sub>/CF catalysts before and after 100 h of durability test.

**Table S1.** A comparison of the HER performances of representative non-precious metal catalysts in a 1.0 M aqueous KOH electrolyte.

| Electrocatalyst                                                          | Overpotential<br>@10 mA·cm <sup>-2</sup><br>(mV) | Overpotential<br>@100 mA·cm <sup>-2</sup><br>(mV) | Tafel slope<br>(mV·dec <sup>-1</sup> ) | Reference |
|--------------------------------------------------------------------------|--------------------------------------------------|---------------------------------------------------|----------------------------------------|-----------|
| O-NiCu                                                                   | 23                                               | 69                                                | 34.1                                   | [1]       |
| Co/Co <sub>2</sub> Mo <sub>3</sub> O <sub>8</sub> /NF                    | 25                                               | 113                                               | 33                                     | [2]       |
| Co <sub>2</sub> N/CoN/Co <sub>2</sub> Mo <sub>3</sub> O <sub>8</sub> /CF | 25                                               | 90                                                | 28                                     | [3]       |
| C-Ni <sub>1-x</sub> O                                                    | 27                                               | –                                                 | 36                                     | [4]       |
| R-CoC <sub>2</sub> O <sub>4</sub> @MXene                                 | 28                                               | 65                                                | 43                                     | [5]       |
| C-Co <sub>2</sub> P                                                      | 30                                               | 65                                                | 36.9                                   | [6]       |
| Co@CoO/NF                                                                | 76                                               | –                                                 | 81                                     | [7]       |
| Co-B-P/NF                                                                | 42                                               | 88                                                | 42.1                                   | [8]       |
| Co-Mo-B/CoMoO <sub>4-x</sub> /NF                                         | 56                                               | 172                                               | 66                                     | [9]       |
| Co-B@CoO/Ti                                                              | 61                                               | 141                                               | 78                                     | [10]      |
| Co-B/Ni                                                                  | 70                                               | 210                                               | 67                                     | [11]      |
| Co-Mo-B/Ti                                                               | 71                                               | 196                                               | 125                                    | [12]      |
| CoB/NF                                                                   | 110                                              | 219                                               | 96                                     | [13]      |
| Co <sub>2</sub> B/CoO/H <sub>3</sub> BO <sub>3</sub> /CF                 | 76                                               | 169                                               | 65                                     | This work |
| Co/CoO/B <sub>2</sub> O <sub>3</sub> /CF                                 | 16                                               | 100                                               | 31                                     | This work |

## References

- [1] J.S. Wang, S.S. Xin, Y. Xiao, Z.F. Zhang, Z.M. Li, W. Zhang, C.J. Li, R. Bao, J. Peng, J.H. Yi, S.L. Chou, *Angew. Chem. Int. Ed.*, 2022, **61**, e202202518.
- [2] M.J. Zang, N. Xu, G.X. Cao, Z.J. Chen, J. Cui, L.Y. Gan, H.B. Dai, X.F. Yang, P. Wang, *ACS Catal.*, 2018, **8**, 5062–5069.
- [3] W.J. Hu, Q. Shi, Z.J. Chen, H. Yin, H.F. Zhong, P. Wang, *ACS Appl. Mater. Interfaces*, 2021, **13**, 8337–8343.
- [4] T.Y. Kou, M.P. Chen, F. Wu, T.J. Smart, S.W. Wang, Y.S. Wu, Y. Zhang, S.T. Li, S. Lall, Z.H. Zhang, Y.S. Liu, J.H. Guo, G.M. Wang, Y. Ping, Y. Li, *Nat. Commun.*, 2020, **11**, 1–10.
- [5] L.Q. Wang, Y.X. Hao, L.M. Deng, F. Hu, S. Zhao, L.L. Li, S.J. Peng, *Nat. Commun.*, 2022, **13**, 5785.
- [6] W.C. Xu, G.L. Fan, S.L. Zhu, Y.Q. Liang, Z.D. Cui, Z.Y. Li, H. Jiang, S.L. Wu, F.Y. Cheng, *Adv. Funct. Mater.*, 2021, **31**, 2107333.
- [7] C.H. Wang, Y.H. Li, C.D. Gu, L.J. Zhang, X.L. Wang, J.P. Tu, *Chem. Eng. J.*, 2022, **429**, 132226.
- [8] H.M. Sun, X.B. Xu, Z.H. Yan, X. Chen, L.F. Jiao, F.Y. Cheng, J. Chen, *J. Mater. Chem. A* 2018, **6**, 22062.
- [9] Y.M. Ren, J.J. Wang, W.J. Hu, H. Wen, Y.P. Qiu, P.P. Tang, M.H. Chen, P. Wang, *ACS Appl. Mater. Interfaces*, 2021, **13**, 42605–42612.
- [10] W.B. Lu, T.T. Liu, L.S. Xie, C. Tang, D.N. Liu, S. Hao, F.L. Qu, G. Du, Y.J. Ma, A.M. Asiri, X.P. Sun, *Small*, 2017, **13**, 1700805.
- [11] W.J. Hao, R.B. Wu, R.Q. Zhang, Y. Ha, Z.L. Chen, L.C. Wang, Y.J. Yang, X.H. Ma, D. Sun, F. Fang, Y.H. Guo, *Adv. Energy Mater.*, 2018, **8**, 1801372.
- [12] Z.M. Sun, S. Hao, X.Q. Ji, X.J. Zheng, J.F. Xie, X.M. Li, B. Tang, *Dalton Trans.* 2018, 47, 7640.
- [13] Z.J. Chen, Q. Kang, G.X. Cao, N. Xu, H.B. Dai, P. Wang, *Int. J. Hydrogen Energy*, 2018, **43**, 6076–6087.
